# Supplementary material for: Changes in α-Farnesene and Phenolic Metabolism and the Expression of Associated Genes during the Development of Superficial Scald in Two Distinct Pear Cultivars
Source: MDPI journal article supplement (doi:10.3390/ijms232012088), 2022-10-11
Supplement: s1 [file s1]

**Table S2.** Relative expression amounts ( $2^{-\Delta\Delta CT}$ ) of  $\alpha$ -farnesene and CTols biosynthesis-related genes, phenolics biosynthesis and metabolism genes in peels of ‘Yali’ and ‘Wujiuxiang’ pears during cold storage and shelf-life.

Note: The 115 + 1, 115 + 3, 115 + 5, and 115 + 7 indicated as 1, 3, 5 and 7 days of shelf life at room temperature (20 °C) after cold storage at 0 °C for 115 days.

Values are presented as mean  $\pm$  standard deviation, different small letters shows significant differences at the 0.05 level.

| Gene         | Time (d)   | 0 d                | 45 d                 | 90 d                | 115 d                | 115+1 d             | 115+3 d            | 115+5 d             | 115+7 d             |
|--------------|------------|--------------------|----------------------|---------------------|----------------------|---------------------|--------------------|---------------------|---------------------|
| <i>GSTU7</i> | Yali       | 1.00 $\pm$ 0.07 i  | 1.57 $\pm$ 0.11 hi   | 3.37 $\pm$ 0.26 ghi | 5.51 $\pm$ 0.39 fg   | 27.61 $\pm$ 1.98 d  | 25.99 $\pm$ 1.19 d | 4.88 $\pm$ 0.56 fgh | 7.10 $\pm$ 0.69 f   |
|              | Wujiuxiang | 1.74 $\pm$ 0.58 hi | 5.723 $\pm$ 2.379 fg | 5.37 $\pm$ 1.23 fg  | 20.21 $\pm$ 1.78 e   | 114.03 $\pm$ 7.64 b | 53.17 $\pm$ 5.50 c | 110.13 $\pm$ 7.71 b | 127.14 $\pm$ 7.94 a |
| <i>FPP</i>   | Yali       | 1.00 $\pm$ 0.13 k  | 5.98 $\pm$ 0.29 de   | 5.77 $\pm$ 0.09 ef  | 4.88 $\pm$ 0.09 g    | 7.33 $\pm$ 0.22 b   | 3.03 $\pm$ 0.11 j  | 4.07 $\pm$ 0.01 h   | 3.58 $\pm$ 0.07 i   |
|              | Wujiuxiang | 3.80 $\pm$ 0.13 hi | 6.25 $\pm$ 0.16 d    | 6.25 $\pm$ 0.17 d   | 6.14 $\pm$ 0.22 d    | 8.79 $\pm$ 0.21 a   | 5.53 $\pm$ 0.14 f  | 8.56 $\pm$ 0.23 a   | 6.83 $\pm$ 0.10 c   |
| <i>HMGR2</i> | Yali       | 1.00 $\pm$ 0.08 c  | 0.93 $\pm$ 0.03 c    | 0.55 $\pm$ 0.06 fg  | 0.49 $\pm$ 0.02 g    | 0.50 $\pm$ 0.02 g   | 1.12 $\pm$ 0.11 b  | 1.09 $\pm$ 0.05 b   | 1.38 $\pm$ 0.06 a   |
|              | Wujiuxiang | 0.37 $\pm$ 0.02 h  | 0.57 $\pm$ 0.02 efg  | 0.93 $\pm$ 0.09 c   | 1.30 $\pm$ 0.05 a    | 0.62 $\pm$ 0.03 def | 0.52 $\pm$ 0.01 g  | 0.68 $\pm$ 0.02 d   | 0.66 $\pm$ 0.01 de  |
| <i>GPX6</i>  | Yali       | 1.00 $\pm$ 0.02 l  | 8.27 $\pm$ 0.06 c    | 4.53 $\pm$ 0.06 h   | 3.88 $\pm$ 0.09 i    | 3.27 $\pm$ 0.08 j   | 3.37 $\pm$ 0.08 j  | 2.92 $\pm$ 0.08 k   | 3.41 $\pm$ 0.01 j   |
|              | Wujiuxiang | 1.20 $\pm$ 0.01 l  | 12.20 $\pm$ 0.63 a   | 10.32 $\pm$ 0.04 b  | 7.27 $\pm$ 0.05 d    | 6.66 $\pm$ 0.17 e   | 3.78 $\pm$ 0.07 i  | 5.49 $\pm$ 0.14 g   | 5.95 $\pm$ 0.10 f   |
| <i>GPX5</i>  | Yali       | 1.00 $\pm$ 0.02 de | 1.07 $\pm$ 0.04 d    | 0.95 $\pm$ 0.04 def | 0.85 $\pm$ 0.02 f    | 0.64 $\pm$ 0.02 h   | 0.71 $\pm$ 0.03 gh | 0.71 $\pm$ 0.02 gh  | 0.65 $\pm$ 0.08 h   |
|              | Wujiuxiang | 0.82 $\pm$ 0.03 fg | 1.83 $\pm$ 0.00 c    | 3.61 $\pm$ 0.21 a   | 2.76 $\pm$ 0.17 b    | 0.89 $\pm$ 0.02 ef  | 0.50 $\pm$ 0.01 i  | 0.48 $\pm$ 0.02 i   | 0.38 $\pm$ 0.00 i   |
| <i>HMGR1</i> | Yali       | 1.00 $\pm$ 0.02 l  | 7.04 $\pm$ 0.28 b    | 5.14 $\pm$ 0.02 d   | 5.02 $\pm$ 0.05 d    | 4.34 $\pm$ 0.18 f   | 2.39 $\pm$ 0.13 ij | 2.51 $\pm$ 0.11 hi  | 2.52 $\pm$ 0.01 hi  |
|              | Wujiuxiang | 1.65 $\pm$ 0.04 k  | 4.78 $\pm$ 0.06 e    | 8.65 $\pm$ 0.04 a   | 6.79 $\pm$ 0.04 c    | 3.47 $\pm$ 0.04 g   | 1.82 $\pm$ 0.02 k  | 2.70 $\pm$ 0.21 h   | 2.24 $\pm$ 0.06 j   |
| <i>AFS1</i>  | Yali       | 1.00 $\pm$ 0.07 k  | 30.71 $\pm$ 2.00 a   | 21.07 $\pm$ 1.11 cd | 20.51 $\pm$ 0.26 cde | 8.96 $\pm$ 0.23 hi  | 13.55 $\pm$ 1.46 g | 19.98 $\pm$ 0.41 de | 21.52 $\pm$ 0.58 c  |
|              | Wujiuxiang | 0.34 $\pm$ 0.02 k  | 19.35 $\pm$ 0.53 e   | 23.16 $\pm$ 0.09 b  | 14.81 $\pm$ 0.43 f   | 7.77 $\pm$ 0.16 i   | 6.28 $\pm$ 0.09 j  | 9.59 $\pm$ 0.20 h   | 9.21 $\pm$ 0.28 h   |

|             |            |              |                |                 |                 |               |                 |               |                |
|-------------|------------|--------------|----------------|-----------------|-----------------|---------------|-----------------|---------------|----------------|
| <i>HCT3</i> | Yali       | 1.00±0.04 a  | 0.58±0.02 f    | 0.63±0.02 ef    | 0.72±0.01 cd    | 0.20±0.00 i   | 0.47±0.05 g     | 0.78±0.03 c   | 0.61±0.03 ef   |
|             | Wujiuxiang | 1.19±0.62 b  | 0.42±0.00 gh   | 0.42±0.02 gh    | 0.28±0.03 i     | 0.36±0.02 h   | 0.73±0.19 de    | 0.68±0.10 de  | 0.68±0.01 de   |
| <i>C3H</i>  | Yali       | 1.00±0.04 b  | 0.77±0.01 c    | 0.62±0.02 d     | 0.52±0.02 e     | 0.39±0.01 f   | 0.44±0.02 f     | 0.53±0.02 e   | 0.56±0.02 e    |
|             | Wujiuxiang | 0.31±0.01 g  | 0.17±0.02 i    | 0.44±0.01 f     | 1.37±0.10 a     | 0.43±0.03 f   | 0.23±0.01 h     | 0.13±0.01 i   | 0.13±0.01 i    |
| <i>PPO5</i> | Yali       | 1.00±0.03 l  | 126.61±1.40 g  | 221.14±3.07 d   | 373.73±8.10 b   | 252.52±8.62 c | 451.79±27.88 a  | 6.18±0.05 l   | 5.77±0.32 l    |
|             | Wujiuxiang | 1.47±0.11 l  | 162.77±3.39 e  | 80.15±2.01 j    | 95.42±7.79 j    | 145.52±3.96 f | 49.75±13.20 k   | 57.53±8.23 k  | 110.77±16.42 h |
| <i>PPO1</i> | Yali       | 1.00±0.04 j  | 1604.70±9.64 a | 1462.87±18.84 b | 1424.57±21.14 c | 856.90±8.58 d | 1471.28±46.59 b | 104.61±0.33 i | 140.42±7.03 h  |
|             | Wujiuxiang | 0.91±0.03 j  | 761.15±5.14 e  | 727.84±10.59 f  | 407.01±46.10 g  | 164.86±6.16 h | 24.70±0.93 j    | 23.48±1.80 j  | 24.62±0.78 j   |
| <i>4CL2</i> | Yali       | 1.00±0.01 h  | 9.52±0.05 cd   | 9.34±0.20 cd    | 10.60±0.21 b    | 13.94±0.31 a  | 14.13±0.98 a    | 3.37±0.10 g   | 8.17±0.04 e    |
|             | Wujiuxiang | 1.44±0.05 h  | 3.91±0.05 g    | 9.62±0.07 cd    | 14.36±1.01 a    | 9.84±0.27 c   | 5.35±1.20 f     | 11.23±1.60 b  | 8.99±0.15 d    |
| <i>HCT1</i> | Yali       | 1.00±0.21 g  | 25.12±2.83 a   | 8.67±1.14 b     | 9.77±1.78 b     | 3.20±0.45 cde | 2.92±0.63 def   | 4.70±0.20 c   | 4.57±0.38 cd   |
|             | Wujiuxiang | 0.73±0.03 g  | 1.19±0.16 fg   | 2.17±0.20 efg   | 0.95±0.04 g     | 1.72±0.21 efg | 0.95±0.40 g     | 1.35±0.41 fg  | 1.41±0.24 efg  |
| <i>C4H3</i> | Yali       | 1.00±0.08 d  | 2.97±0.25 a    | 1.67±0.19 b     | 1.68±0.10 b     | 1.65±0.14 b   | 1.43±0.13 c     | 1.78±0.08 b   | 1.59±0.09 bc   |
|             | Wujiuxiang | 0.34±0.02 g  | 0.36±0.01 g    | 0.66±0.08 f     | 0.52±0.07 fg    | 0.89±0.06 de  | 0.72±0.09 ef    | 0.99±0.22 d   | 0.92±0.09 de   |
| <i>C4H1</i> | Yali       | 1.00±0.01 h  | 3.23±0.07 a    | 1.63±0.03 cde   | 1.39±0.00 fg    | 1.31±0.05 g   | 1.26±0.03 g     | 1.59±0.01 def | 1.59±0.08 def  |
|             | Wujiuxiang | 0.72±0.01 i  | 1.53±0.06 ef   | 3.03±0.17 a     | 2.16±0.22 b     | 1.70±0.07 cde | 1.26±0.28 g     | 1.81±0.27 cd  | 1.84±0.04 c    |
| <i>ANR</i>  | Yali       | 1.00±0.04 e  | 0.44±0.01 gh   | 0.52±0.03 fgh   | 0.53±0.01 fgh   | 1.31±0.06 d   | 1.19±0.04 d     | 0.95±0.04 e   | 0.66±0.03 f    |
|             | Wujiuxiang | 0.59±0.02 fg | 1.48±0.06 c    | 4.29±0.23 a     | 2.09±0.20 b     | 1.22±0.02 d   | 0.38±0.08 h     | 0.43±0.04 h   | 0.17±0.00 i    |
| <i>PAL2</i> | Yali       | 1.00±0.08 g  | 0.14±0.03 g    | 0.08±0.01 g     | 0.09±0.01 g     | 0.42±0.01 g   | 0.04±0.00 g     | 0.09±0.00 g   | 0.04±0.01 g    |
|             | Wujiuxiang | 1.57±0.08 g  | 18.36±0.21 f   | 121.32±2.65 a   | 71.10±8.48 b    | 36.60±0.93 d  | 25.06±1.20 e    | 41.76±5.56 c  | 34.67±1.33 d   |

|             |            |              |              |              |              |              |              |              |              |
|-------------|------------|--------------|--------------|--------------|--------------|--------------|--------------|--------------|--------------|
| <i>LAC7</i> | Yali       | 1.00±0.10 ef | 0.23±0.03 ef | 0.11±0.00 f  | 0.17±0.03 f  | 1.12±0.23 ef | 1.44±0.04 ef | 0.57±0.05 ef | 1.67±0.02 ef |
|             | Wujiuxiang | 0.74±0.11 ef | 0.57±0.06 ef | 1.00±0.16 ef | 2.46±0.27 e  | 13.65±0.48 c | 34.66±0.12 b | 36.01±4.64 a | 10.28±0.75 d |
| <i>PAL1</i> | Yali       | 1.00±0.02 ef | 0.65±0.03 fg | 0.25±0.01 g  | 0.22±0.01 g  | 0.40±0.01 g  | 0.43±0.01 g  | 1.31±0.02 de | 1.75±0.02 d  |
|             | Wujiuxiang | 0.48±0.02 g  | 1.12±0.02 ef | 6.92±0.16 b  | 1.37±0.10 de | 2.92±0.13 c  | 1.69±0.38 d  | 8.74±0.95 a  | 7.16±0.41 b  |
