# Supplementary material for: Changes in α-Farnesene and Phenolic Metabolism and the Expression of Associated Genes during the Development of Superficial Scald in Two Distinct Pear Cultivars
Source: MDPI journal article supplement (doi:10.3390/ijms232012088), 2022-10-11
Supplement: s1 [file s1]

**Table S1.** Primer sequence for RT-PCR quantitative analysis

| Gene          | Genbank ID   | Sequence (5'-3')                                    | Source of primers |
|---------------|--------------|-----------------------------------------------------|-------------------|
| <i>ACTIN2</i> | GU830959     | GGACATTCAACCCCTCGTCT<br>ATCCTTCTGACCCATACCAACC      | [43]              |
| <i>AFS1</i>   | DQ309034     | AATGGTTGGAACCAAGTATTACC<br>GAAACTGATGATGAATCGCATCC  |                   |
| <i>HMGR1</i>  | XM_009360626 | GTTCTCACTGCATTACCATG<br>TCAGACAAGCGGATTGAGATG       |                   |
| <i>HMGR2</i>  | KF861867     | CAGTTGGAGGAGGAACCCAG<br>AGTTTGAACCGGTGAGTC          | [6]               |
| <i>GSTU7</i>  | XM_009372621 | ATGGTTCGGTGTTTGTTCCA<br>GAGGGTCATTTGGCAGCAGA        |                   |
| <i>GPX5</i>   | XM_009349430 | GGGACAAGTCAGGATGCTGAAC<br>ACAGGTTCTGTATCCGGCCCA     |                   |
| <i>GPX6</i>   | XM_009341641 | AGACCCTTTGGCCACGGTCG<br>CGGACTGGCCAGCCATTGTA        |                   |
| <i>FPP</i>    | XM_009349237 | GAAATCTGAGCTTCTCAATGATCC<br>CCTCGATTCAAGCTTTCCTCC   | [18]              |
| <i>PAL1</i>   | GU906268     | GACGCACAAGTTGAAGCACC<br>TTTGACATAAGAGCTGCCATCC      |                   |
| <i>PAL2</i>   | GU906269     | ACCAAAAAGAAGGGCTTGCCT<br>AAAGCGCTTGTGTGTTAGCG       | [27]              |
| <i>C4H1</i>   | XM_009376113 | AACTTCGAGCTTCTGCCTCC<br>CCCCAAGCATCAATCTACGC        |                   |
| <i>C4H3</i>   | XM_009356605 | AACTTGGAGCTTCTGCCTCC<br>AAAGAAATCATTAATCTACGCCCTC   |                   |
| <i>4CL2</i>   | XM_009353551 | AATTCAAAGGCTTCCAAGTGC<br>CACTAGACCGAACCACAAATGC     | [44]              |
| <i>C3H</i>    | XM_009355500 | TTACAAGCCGTGCCTACTCC<br>CACAAAAACAAGAACTACTACGG     | [27]              |
| <i>HCT1</i>   | JQ280303     | CCCCCTCCAGTCTGACCA<br>CCAATGAAAACACAAACACGTC        |                   |
| <i>HCT3</i>   | NM_001302311 | ACGATATGCGTGAGAAGTTTATCC<br>AGCACTAGGAAAGAAACACGACC | [44]              |
| <i>ANR</i>    | XM_009370102 | GTAGCCCTTCTGGAGCAGC<br>ACAACCCATCTCAAAGAAGACG       | [45]              |
| <i>PPO1</i>   | HQ729709     | TCCCTACTCACAAGCCCAAG<br>GACCTCCAAGACCAAGAAGCA       | [27]              |
| <i>PPO5</i>   | GU906266     | ACCAAAACAAAACCATTCAC<br>CAGCCACTCCACCATACAGG        |                   |
| <i>LAC7</i>   | XM_009348720 | TCATCAACCCCATATGC<br>GAACATGTGCTCGTCCACC            | [20]              |
